# Supplementary material
Source: HighWire-hosted journal article supplement (https://erj.ersjournals.com/content/55/5/2000413)
Supplement: inline-supplementary-material-1 [file inline-supplementary-material-1.pdf]

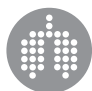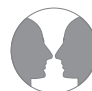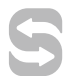

SHAREABLE PDF

# The ERS approach to e-cigarettes is entirely rational

Andrew Bush<sup>1</sup>, Jayesh Mahendra Bhatt <sup>2</sup>, Will Carroll<sup>3</sup>, Frances Child<sup>4</sup>, Gary Connett<sup>5</sup>, Iolo Doull<sup>6</sup>, Francis Gilchrist <sup>7,8</sup>, Jonathan Grigg<sup>9</sup>, Simon Langton-Hewer<sup>10</sup>, Julian Legg<sup>11</sup>, Warren Lenney<sup>12</sup>, James Paton<sup>13</sup>, Michael Shields<sup>14</sup> and Ian Sinha<sup>15</sup>

**Affiliations:** <sup>1</sup>Imperial College, National Heart and Lung Institute, Royal Brompton and Harefield NHS Foundation Trust, London, UK. <sup>2</sup>Paediatric Respiratory Medicine, Nottingham Children's Hospital, Nottingham University Hospitals NHS Trust, Nottingham Children's Hospital, Nottingham, UK. <sup>3</sup>Paediatrics, Derby Hospitals NHS Trust, University Hospitals of North Midlands NHS Trust, Stoke-on-Trent, UK. <sup>4</sup>Dept of Respiratory Paediatrics, Central Manchester and Manchester Children, Manchester, UK. <sup>5</sup>University Hospital Southampton NHS Foundation Trust, University Hospital Southampton, Southampton, UK. <sup>6</sup>Children's Hospital for Wales, Cardiff, UK. <sup>7</sup>Paediatric Respiratory Services, University Hospitals of North Midlands NHS Trust, Royal Stoke University Hospital, Stoke-on-Trent, UK. <sup>8</sup>Institute of Applied Clinical Science, Keele University, Keele, UK. <sup>9</sup>Centre for Paediatrics, Queen Mary University London, London, UK. <sup>10</sup>Respiratory Medicine, Bristol Royal Hospital for Children, Bristol, UK. <sup>11</sup>Southampton University Hospitals NHS Trust, Southampton, UK. <sup>12</sup>Academic Department of Child Health, University Hospital of North Staffordshire and Keele University, Stoke-on-Trent, UK. <sup>13</sup>Royal Hospital for Sick Children, Glasgow, UK. <sup>14</sup>Centre for Experimental Medicine, Queen's University Belfast, Belfast, UK. <sup>15</sup>Alder Hey Children's NHS Foundation Trust, Liverpool, UK.

**Correspondence:** Andrew Bush, National Heart and Lung Institute, Royal Brompton and Harefield NHS Foundation Trust, Sydney Street, London NW103BJ, UK. E-mail: a.bush@rbht.nhs.uk

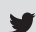

@ERSpublications

The ERS has the right approach to e-cigarettes <https://bit.ly/3ax72oe>

**Cite this article as:** Bush A, Bhatt JM, Carroll W, *et al.* The ERS approach to e-cigarettes is entirely rational. *Eur Respir J* 2020; 55: 2000413 [<https://doi.org/10.1183/13993003.00413-2020>].

This single-page version can be shared freely online.

## To the Editors:

The call for the European Respiratory Society (ERS) to change their e-cigarette and vaping policy, from honourable people with decades of experience fighting the evils of tobacco, is unfortunately misconceived. The three issues of greatest concern are acute toxicity, chronic toxicity and, most importantly, the effects on children and young people. The efficacy of e-cigarettes as an adjunct to smoking cessation are outwith the expertise of paediatric specialists, but we would ask for assurances that any benefits really do outweigh the risks to children and young people (below). Our comments on these key issues are as follows:
